# Supplementary material for: Comparison of the Ecological Traits and Boring Densities of Aromia bungii (Faldermann, 1835) (Coleoptera: Cerambycidae) in Two Host Tree Species
Source: MDPI journal article supplement (doi:10.3390/insects13020151), 2022-01-30
Supplement: s1 [file s1]

## List of changes

P1 L5, 37: We checked our names and affiliations.

P2 L9: We confirmed that all highlighted red words were acceptable.

P2 L12: We changed “2013” to “2012”.

P7 L2: We added the revised Figure 2.

P11 L5: These indicates the min.–max. range of the lifetime fecundity (number of eggs).  
We think readers understand that if they read the previous sentence.

P12 L20: The supplementary materials were mentioned in main text as suggested.

P12 L25: The individual contribution of each co-author was checked.

P12 L31 We checked the funding data.

P12 L35: We provided information in Informed Consent Statement.

P12 P38: We checked acknowledgements.

P13 L11: We changed the description of reference No.5.
